# Supplementary material for: Identification of Genes Required for Neural-Specific Glycosylation Using Functional Genomics
Source: PLoS Genet. 2010 Dec 23;6(12):e1001254. doi: 10.1371/journal.pgen.1001254 (PMC3009669; doi:10.1371/journal.pgen.1001254)
Supplement: Table S3 — Glycosylation Screening Results using VDRC RNAi fly strains. (0.06 MB XLS) [file pgen.1001254.s008.xls]

## Sheet: Table S3
Table S3. Glycosylation screening results using VDRC RNAi fly strains
CG No.	Transformant ID	z-score					Primary screen results	Reproducibility test results	Validation protocol	Line ID or transformant ID used for validation	Validation results	Reason for exclusion	Rank
		ConA	LCA	DSA	WGA	HRP
CG8651	37715	-0.730895	1.09819	-5.07341	2.53292	1.78954	P	P	2nd target dsRNA	108122(VDRC)	P		1
CG12000	16382	-0.670269	-0.514832	-2.81459	3.27646	2.96478	P	P	test of suspected off-target genes		P		2
CG12932	38746	0.661303	1.61097	-17.1739	-3.97166	1.14536	P	P	test of suspected off-target genes		P		2
CG14359	28489	0.181347	1.12982	-9.10966	-0.13773	0.189756	P	P	test of suspected off-target genes		P		2
CG5119	22007	1.24943	-0.0816008	-4.67933	1.18171	-1.58483	P	P	test of suspected off-target genes		P		2
CG5266	29686	-4.06719	0.71589	-8.25625	1.29637	0.779944	P	P	test of suspected off-target genes		P		2
CG31000	33735	1.07016	1.51179	-3.59196	1.15025	1.38871	P	P	2nd target dsRNA	31000G	N	not validated
CG2998	35783	-0.630451	1.18996	-5.71747	-1.71508	-3.15663	P	P	test of suspected off-target genes		N	suspected genes not available
CG8435	28900	2.70436	1.46751	2.01826	0.602299	-6.47676	P	P	test of suspected off-target genes		N	suspected genes not available
CG15752	43686	1.10692	0.620958	-0.111029	-9.79334	1.59121	P	P	scoring of off-target probability		N	OTPS>2
CG11213	41344	3.36409	1.85957	1.60333	1.28801	1.08271	P	N				not repeating
CG12849	29766	1.17493	0.375748	0.555204	3.28768	0.983004	P	N				not repeating
CG13159	8771	-0.329436	-0.517048	-5.24823	ND	-4.1072	P	N				not repeating
CG17934	19093	0.907851	-0.567113	-0.623979	-3.17286	0.284128	P	N				not repeating
CG18619	19110	-0.378333	-0.965308	-0.966949	8.48997	-0.503246	P	N				not repeating
CG3325	30490	0.706779	0.931533	-10.665	0.16757	0.138791	P	N				not repeating
CG3647	47973	0.557737	0.529939	1.12348	3.01434	0.760697	P	N				not repeating
CG5642	46592	3.2705	1.97482	1.3534	0.831593	1.02153	P	N				not repeating
CG7793	42848	3.9583	3.16897	2.77541	2.42116	4.18373	P	N				not repeating
CG9102	8943	4.13735	2.14946	2.41931	1.14102	0.742553	P	N				not repeating
CG9313	29098	-0.302738	0.818935	-5.52104	-0.721386	-0.894451	P	N				not repeating
CG3199	41773	3.36978	1.15547	2.12709	0.681004	0.900708	P	NA
CG7787	45715	3.64044	2.13395	0.665077	0.661346	1.79836	P	NA
CG10002	37062	0.125795	-1.96189	0.632949	0.160906	-0.136875	N
CG10103	31174	-1.11309	-0.702042	1.31112	-1.19667	-0.2091	N
CG10108	35469	-0.691195	-0.308924	1.08985	0.122026	0.101648	N
CG10112	13971	-0.590689	-1.55501	0.861028	-1.06524	0.367548	N
CG10295	12553	0.468288	0.870911	2.72385	2.36931	2.24997	N
CG10484	49423	0.553029	-0.352407	0.139973	-0.302535	-0.376796	N
CG10650	6435	-0.325133	-1.44263	-0.14686	0.173534	-0.445256	N
CG10869	27326	0.46975	-0.431231	2.1954	0.137981	1.46699	N
CG10923	52105	-1.21075	-1.07023	-0.326861	-0.336279	0.902117	N
CG11138	18154	0.416564	-1.36226	-0.213622	0.301201	-1.1271	N
CG11286	17541	0.481734	0.266426	-0.761474	-1.1778	0.5482	N
CG1135	15613	-1.26896	-0.909441	-0.923532	-1.18631	0.528115	N
CG11449	31503	-0.519562	-0.66909	-1.65885	-0.868263	2.19667	N
CG11465	28457	-0.997594	0.878419	1.02955	0.389624	0.183043	N
CG11489	8451	-0.411028	-0.244693	2.92147	1.74135	1.18273	N
CG11502	37086	-0.491927	-0.103226	0.48076	-0.0263971	1.8553	N
CG11591	22768	0.0441493	0.141349	-1.94894	0.584226	-0.789438	N
CG11902	16361	-0.667436	-1.43784	-0.49076	-1.17661	0.197428	N
CG12001	16383	-0.364684	-0.295946	0.735189	-1.47808	1.28257	N
CG12379	35662	-1.7457	-1.58586	-0.228156	-1.15866	-1.15273	N
CG12470	3806	0.245063	-0.270145	0.908588	-0.682242	0.0693891	N
CG12727	17302	-2.34294	-1.46731	-1.71499	-2.09089	-0.734634	N
CG12845	8712	-1.04984	-1.89234	1.21874	-0.0137224	-0.768935	N
CG13085	51767	-2.01207	-0.354071	-0.845183	-0.121751	-0.95071	N
CG13138	27132	1.64098	0.744879	-0.896317	0.132957	-0.013497	N
CG13349	23873	-1.44317	-1.55328	1.67434	-0.675164	1.48872	N
CG1341	50391	0.0444402	0.263954	-0.0095598	-0.330709	0.38508	N
CG13458	17194	-1.22253	-0.393569	-0.619475	-1.6251	0.793752	N
CG13636	1218	-0.300632	-0.68776	1.0247	-0.436128	0.374754	N
CG13749	29753	0.515761	-0.5976	0.47534	-0.592078	-0.0417377	N
CG13752	877	-2.21978	-0.752541	-1.02001	-0.846918	-1.21833	N
CG13779	31787	-1.0177	-0.329812	1.35656	-2.11308	-0.165733	N
CG13838	46089	-2.34988	-1.72865	0.0737414	-0.778727	-0.603756	N
CG13955	31837	-0.839632	-0.153586	0.139667	-1.00478	-0.0611289	N
CG13966	17772	-0.118842	-0.573672	0.990969	-0.0519826	0.488051	N
CG14104	17383	0.273405	0.971547	-0.174596	-1.18984	0.579877	N
CG14126	17407	0.763508	1.46675	-1.09319	-0.398575	-0.950371	N
CG14282	17460	0.373747	-0.268496	0.199828	-0.566086	0.402498	N
CG14296	24617	-0.600653	-0.0910746	-0.668783	1.5619	0.456672	N
CG14490	17659	-0.576957	-0.134002	1.32695	2.33556	1.02173	N
CG14534	24867	-1.19211	2.16504	-1.30522	2.4035	-0.327917	N
CG14639	18903	0.238224	-0.47521	-1.38695	0.140193	-1.13181	N
CG1474	42996	-0.667035	-1.09626	0.11019	0.297149	-1.6006	N
CG14868	51809	-0.606793	0.552344	0.44219	0.617778	0.356674	N
CG14904	31916	0.965371	1.11321	0.86424	1.38949	0.799029	N
CG15723	28566	-0.693343	0.0277151	-0.219697	-2.10289	-0.514629	N
CG15741	14885	-0.768571	-0.972195	-2.2346	-0.392276	-0.559194	N
CG15751	19594	-2.78454	-1.80419	-0.219487	-0.721133	-0.964189	N
CG15861	15251	0.152475	1.01648	-1.16812	-0.867428	0.34889	N
CG1641	11797	0.767198	0.102213	1.28852	1.06679	0.704847	N
CG17136	21083	-0.245319	-1.51395	-0.498287	-0.830914	-1.02568	N
CG17163	43106	-0.00675425	-0.415925	-0.174548	-1.07407	-0.611374	N
CG17226	33121	0.370372	-0.222443	-0.455196	2.12248	-0.489936	N
CG17358	12654	0.922294	0.938351	1.44369	0.671502	-0.948886	N
CG17450	50795	-2.60139	0.0894387	-1.52274	-1.30012	-0.232025	N
CG17777	23551	-0.271777	0.231129	-0.560273	0.966351	0.0727635	N
CG17946	23560	0.427591	0.868405	-0.852891	1.72669	0.765781	N
CG18085	49924	-2.00789	-1.55588	-0.990839	-0.590721	-1.54091	N
CG18347	6076	-0.292393	-1.70157	0.837303	0.318129	-0.418068	N
CG1848	25343	0.734484	1.05107	-2.23733	-0.979134	-2.77517	N
CG18671	33394	-0.346613	2.58497	0.474579	0.670757	-0.986546	N
CG2678	13710	-0.0597777	0.461737	0.955638	-0.191997	0.555761	N
CG2715	32413	-0.865744	-0.0206604	-2.31834	0.823767	-1.37166	N
CG2852	15069	0.403463	2.0215	0.522824	-0.139174	0.46008	N
CG2865	20924	0.365143	0.623808	-1.8973	-0.234179	-0.237744	N
CG30035	8126	-0.72953	-1.26928	1.37243	-0.503736	-0.602109	N
CG30063	48778	-0.880235	-0.73475	0.639299	0.196425	0.653116	N
CG3018	33684	0.537876	0.267208	-0.106727	0.14839	1.192	N
CG31111	40198	1.21031	1.97844	2.57549	-0.420738	2.62603	N
CG31120	3402	-0.635991	0.221495	-0.743011	-2.74882	-1.16531	N
CG31134	33775	-1.34596	0.547295	-0.925644	-0.873465	-0.196595	N
CG31135	51207	0.317694	-0.107257	0.501773	-1.42354	2.02644	N
CG31149	9869	0.0352413	0.775272	1.56009	-0.394944	-0.426277	N
CG31232	13090	0.284195	-0.0485047	1.16418	-0.427687	-0.557596	N
CG31639	32443	-0.531123	-0.843059	-0.286423	-0.785804	-0.503535	N
CG3187	40295	1.10909	-0.405573	2.96287	1.41586	0.310589	N
CG32016	34755	-0.929219	-0.845509	-1.61079	-1.33407	-0.0894768	N
CG32030	34034	-0.643852	-1.76304	-0.189453	-0.0198503	-1.87749	N
CG32086	19259	-0.429044	-0.365258	-1.32323	-1.55394	0.389215	N
CG32473	8281	-0.737198	-0.352775	1.64008	0.27305	0.469451	N
CG3501	26025	-0.671418	-0.413009	0.585991	-0.124652	1.58845	N
CG3668	37637	-0.673181	-0.200864	-0.0929006	1.13599	1.77735	N
CG3923	34737	-0.850415	-1.35182	0.208712	-0.667603	-0.947366	N
CG3995	26068	0.148372	0.802111	-0.251837	1.99536	-0.313387	N
CG4027	7140	0.586023	-0.756957	0.89997	0.983214	-0.460322	N
CG4394	34835	1.76661	0.949586	1.76783	0.763505	1.55344	N
CG4488	26543	2.43187	0.387328	2.27356	-0.715829	-0.720279	N
CG4520	34862	-1.44747	-1.1085	-1.24817	2.43707	-1.18479	N
CG4711	47103	-0.767065	0.749012	-1.02806	-0.395924	0.442504	N
CG4720	34891	-0.94283	-1.70126	0.846724	-1.08701	-0.916733	N
CG4901	34904	-1.01257	-1.46011	0.0950433	2.07865	-0.901859	N
CG4959	21554	0.339242	-1.07556	-0.655842	-1.28164	-1.20672	N
CG5023	34914	0.746923	1.76716	2.98097	-0.471122	2.08566	N
CG5333	22066	-0.98369	-0.29261	0.603161	0.177056	-0.756109	N
CG5363	41838	1.78356	0.227542	0.604974	-0.143387	-0.378715	N
CG5460	24466	-0.385499	-0.7856	-0.93432	2.13034	-0.208614	N
CG5530	9129	-1.03975	-0.246469	-0.934372	-0.504255	-0.258793	N
CG5658	40603	-0.220614	1.28663	2.473	0.184604	0.515536	N
CG5700	41320	-0.040565	0.165154	0.0335013	1.38901	0.36068	N
CG5812	41335	1.97745	1.52953	2.94173	2.60491	1.25839	N
CG5941	48773	-2.41131	0.258817	0.258008	0.2966	-0.269057	N
CG5942	37721	-0.472447	-0.950398	0.40707	0.634938	1.0148	N
CG6141	22244	1.09299	2.48303	0.683071	0.741121	1.88001	N
CG6203	8933	0.675313	1.42732	1.7491	0.821227	1.73735	N
CG6398	9146	-0.05792	1.15077	1.76529	0.152621	-0.191347	N
CG6522	22500	0.626521	0.899613	-0.232929	0.117789	0.155633	N
CG6539	49506	0.863654	-0.0298157	-1.75345	0.890515	-0.282629	N
CG6770	35824	-2.00699	-0.755844	-0.997098	-1.59533	-0.536472	N
CG6800	40394	0.645731	-1.30997	0.549504	0.411287	0.966539	N
CG6899	1012	1.13586	0.608903	0.724154	0.871318	1.49539	N
CG6911	14572	-1.63112	-1.4611	-1.25532	-1.40478	-1.36064	N
CG6945	41854	2.28155	1.42495	1.2542	0.602355	0.369783	N
CG7109	35171	0.530106	-0.574618	0.960515	1.38232	0.0935669	N
CG7285	13560	-0.980016	-0.763588	-0.240274	-1.25343	0.0659588	N
CG7570	24705	0.868937	0.0126304	-0.26823	0.305567	-1.48674	N
CG7637	23669	-0.584745	-0.552792	-0.63411	0.494732	0.0500873	N
CG7744	33246	-0.11414	-0.0994405	0.355034	1.33375	0.423341	N
CG7763	39948	0.644599	-0.107566	0.732306	-0.320909	0.679779	N
CG7786	12689	0.82001	0.219174	1.24996	-0.530018	0.581945	N
CG7818	13541	0.384528	-1.24799	0.125401	-2.52588	0.0898424	N
CG8019	41022	-1.93197	-1.4799	0.986671	-0.343767	0.586135	N
CG8038	28179	0.29263	-0.200386	2.7586	1.50301	0.983399	N
CG8079	23024	-0.0144887	0.375058	1.25175	-1.52927	-1.23552	N
CG8207	24236	-1.46102	-0.80883	-2.19649	-0.211513	-1.06446	N
CG8495	28849	0.541129	-0.171852	1.90751	-0.683666	-0.372492	N
CG8614	42146	0.048027	0.473245	0.778205	0.858381	0.942964	N
CG8665	35999	0.864389	0.190862	1.11782	2.21908	0.478372	N
CG8808	37966	-0.364789	-0.61737	1.51371	-1.02128	-1.09977	N
CG8813	36038	-1.49221	-2.1672	-0.701667	0.761941	-0.730244	N
CG8854	23631	0.0683018	-0.280749	0.378643	1.63164	1.41586	N
CG8893	23645	-1.14959	-0.140296	-0.339512	-1.17493	-1.12957	N
CG8933	7802	0.0916971	-1.10612	0.638184	-0.626627	-0.60059	N
CG9071	4061	-1.09209	-1.58545	-0.110172	-1.54066	0.726838	N
CG9121	46328	-0.936536	-0.775108	-0.987447	-0.329261	1.21821	N
CG9206	3785	0.60128	0.659009	-0.537579	1.99471	0.474856	N
CG9277	24138	1.07986	-0.298272	-1.02015	-0.84967	-0.345081	N
CG9326	24156	0.880007	2.57294	1.65024	0.730646	-0.380112	N
CG9399	13788	1.4259	1.59214	1.54618	-0.20055	-0.474837	N
CG9470	23697	-0.746671	0.0759259	-0.223746	-0.00426769	-0.817034	N
CG9572	44802	-0.85669	-1.31064	-0.515267	-0.655897	0.318255	N
CG9654	29116	-0.394273	-1.04978	0.0141337	0.00496503	-1.18664	N
CG9665	23720	-0.0774202	-0.111267	-2.66927	1.33303	0.985056	N
CG9911	46585	-0.974779	-1.36222	0.28576	0.241029	0.154961	N
CG9951	29457	0.389808	0.22322	0.528823	0.315119	-0.680824	N
CG10037	10756						lethal
CG10938	16105						lethal
CG12323	38659						lethal
CG1417	18561						lethal
CG1489	24936						lethal
CG18412	50027						lethal
CG18806	19197						lethal
CG2224	20852						lethal
CG31121	43981						lethal
CG8392	35923						lethal
CG9075	42202						lethal
CG10514	16063						not detectable
CG10798	2947						not detectable
CG3455	34624						not detectable
CG3794	20117						not detectable
CG4863	23419						not detectable
CG5099	44895						not detectable
CG6779	37741						not detectable
CG8882	28976						not detectable
