# Supplementary material for: Identification of Genes Required for Neural-Specific Glycosylation Using Functional Genomics
Source: PLoS Genet. 2010 Dec 23;6(12):e1001254. doi: 10.1371/journal.pgen.1001254 (PMC3009669; doi:10.1371/journal.pgen.1001254)
Supplement: Table S4 — Glycosylation-related genes identified in this study. (0.08 MB XLS) [file pgen.1001254.s009.xls]

## Sheet: Table S4
Table S4. Glycosylation-related genes identified in this study
CG No.	Lectins that detect glycosylation defects	Lectin values normalized to control	Reproducibility p value	Validation p value	Rank	Gene name	Domains (InterPro)	Family (Panther)	Possible function	Results of secondary screen
CG10084	HRP	0.485048	4.52428e-16	3.4273e-06	1	second mitotic wave missing (swm)	Zinc finger, CCCH-type (IPR571) Nucleotide-binding, alpha-beta plait (IPR12677) RNA recognition motif, RNP-1 (IPR54)		RNA regulation	**
CG10279	HRP DSA	1.66 0.64	4.22569E-19 2.59229E-08	1.82848E-08 0.024328355	1	Rm62	RNA helicase, ATP-dependent, DEAD-box, conserved site (IPR629) DNA/RNA helicase, C-terminal (IPR165) DNA/RNA helicase, DEAD/DEAH box type, N-terminal (IPR11545) DEAD-like helicase, N-terminal (IPR141) RNA helicase, DEAD-box type, Q motif (IPR1414) Helicase, superfamily 1 and 2, ATP-binding (IPR1421)	ATP-DEPENDENT RNA HELICASE DBP3 (YEAST)-RELATED (DEAD BOX POLYPEPTIDE 5, 17, P68)(PTHR1967:SF5)	RNA regulation
CG1129	WGA HRP	2.79 0.54	1.87601E-28 1.17127E-13	*	1		Bacterial transferase hexapeptide repeat (IPR1451) Nucleotidyl transferase (IPR5835) Trimeric LpxA-like (IPR114)	MANNOSE-1-PHOSPHATE GUANYLTRANSFERASE(PTHR22572:SF15)	glycosylenzyme
CG11661	HRP DSA	1.44 0.55	0.000433568 1.95594E-06	2.42262E-07 1.31934E-05	1	Neural conserved at 73EF (Nc73EF)	Dehydrogenase, E1 component (IPR117) Transketolase, central region (IPR5475) 2-oxoglutarate dehydrogenase, E1 component (IPR1163)		mitochondria
CG11856	HRP DSA	1.26 0.59	0.002798743 5.09293E-07	0.022817742 0.009353199	1	Nup358	Ran Binding Protein 1 (IPR156) Zinc finger, RanBP2-type (IPR1876) Tetratricopeptide-like helical (IPR1199) Pleckstrin homology-type (IPR11993) Tetratricopeptide region (IPR1326)	RAN-BINDING PROTEIN(PTHR23138:SF5)	traffic
CG11892	DSA	0.589611	0.000355923	0.0115867	1		CHK kinase-like (IPR15897) Protein of unknown function DUF227 (IPR4119) Protein kinase-like (IPR119)	UNCHARACTERIZED(PTHR1112)	signal transduction
CG1291	WGA HRP	3.28 1.24	8.41656E-31 0.000179069	5.00295E-08 8.32341E-06	1		Glycosyl transferase, group 1 (IPR1296)	ALPHA-1,3-MANNOSYLTRANSFERASE(PTHR12526:SF22)	glycosylenzyme
CG13144	DSA	0.608924	8.94739e-07	0.00694946	1		Tobacco mosaic virus-like, coat protein (IPR1337)		unknown
CG1318	WGA	1.92882	2.39184e-16	0.00433344	1	Hexosaminidase 1 (Hexo1)	Glycoside hydrolase, family 2 (IPR154) Beta-N-acetylhexosaminidase-like (IPR15882) Glycoside hydrolase, family 2, catalytic core (IPR15883) Glycoside hydrolase, subgroup, catalytic core (IPR13781) Glycoside hydrolase, catalytic core (IPR17853)	BETA-HEXOSAMINIDASE(PTHR226)	glycosylenzyme
CG13431	DSA HRP	0.71 0.48	0.001700439 5.74017E-11	2.69704E-05 1.84449E-07	1	UDP-GlcNAc:a-3-D-mannoside-β-1,2-N-acetylglucosaminyltransferase I (Mgat1)	Glycosyl transferase, family 13 (IPR4139)	ALPHA-1,3-MANNOSYL-GLYCOPROTEIN BETA-1, 2-N-ACETYLGLUCOSAMINYLTRANSFERASE(PTHR1468)	glycosylenzyme
CG13961	HRP DSA	1.87 0.61	3.72327E-28 3.55474E-05	0.049837656 0.000116688	1	sickie (sick)	AAA+ ATPase, core (IPR3593) Calponin-like actin-binding (IPR1715) Calponin-homology (IPR16146)		others
CG14472	HRP DSA	1.77 0.53	8.29815E-27 2.21823E-07	*	1	purity of essence (poe)	Zinc finger, N-recognin (IPR3126) WD4 repeat-like (IPR1146) Zinc finger, N-recognin, metazoa (IPR13993)	PUSHOVER/RETINOBLASTOMA-ASSOCIATED FACTOR 6(PTHR21725)	others
CG14542	DSA	0.455186	1.9152e-15	0.0098094	1	Vps20	Snf7 (IPR524)	SNF7-LIKE PROTEIN (BC-2) (PUTATIVE BREAST ADENOCARCINOMA MARKER)(PTHR1476:SF4)	traffic
CG1521	DSA	0.68496	0.0014272	0.00227838	1			DIVALENT CATION TRANSPORTER (SOLUTE CARRIER FAMILY 41)(PTHR16228)	others
CG15506	DSA	0.371447	3.24529e-13	0.0303158	1				unknown
CG15589	HRP DSA	1.51 0.61	8.78721E-22 3.51826E-07	1.37297E-05 0.002727216	1				unknown
CG17246	DSA	0.466045	2.2554e-07	0.0489077	1	Succinyl coenzyme A synthetase flavoprotein subunit (Scs-fp)	Fumarate reductase/succinate dehydrogenase flavoprotein-like, C-terminal (IPR15939) Pyridine nucleotide-disulphide oxidoreductase, class I (IPR11) Fumarate reductase/succinate dehydrogenase, FAD-binding site (IPR3952) Fumarate reductase/succinate dehydrogenase flavoprotein, N-terminal (IPR3953) Fumarate reductase/succinate dehydrogenase flavoprotein, C-terminal (IPR4112) Succinate dehydrogenase, …	SUCCINATE DEHYDROGENASE 2 FLAVOPROTEIN SUBUNIT(PTHR11632:SF5)	mitochondria
CG17489	DSA	0.352229	2.47502e-14	0.000123285	1	RpL5	Ribosomal protein L18/L5 (IPR5484) Ribosomal protein L5, eukaryotic (IPR5485)		translation
CG17562	DSA	0.67116	1.74223e-06	0.0210815	1		Male sterility (IPR004262) Male sterility, NAD-binding (IPR013120) NAD(P)-binding (IPR016040)	MALE STERILITY PROTEIN 2-RELATED(PTHR11011:SF6)	others
CG18004	DSA	0.663518	2.607e-07	0.0154434	1			UNCHARACTERIZED(PTHR21812)	unknown
CG18005	HRP	0.72357	1.15075e-06	0.0125119	1		RED-like, C-terminal (IPR12492) RED-like, N-terminal (IPR12916)	RED PROTEIN (IK FACTOR) (CYTOKINE IK)(PTHR12765)	signal transduction	**
CG1970	DSA	0.126514	2.68452e-18	0.000170902	1		NADH-ubiquinone oxidoreductase, chain 49kDa (IPR1135) NADH dehydrogenase I, D subunit (IPR1219) NADH-ubiquinone oxidoreductase, chain 49kDa, conserved site (IPR1429)	NADH-UBIQUINONE OXIDOREDUCTASE 49 KDA SUBUNIT(PTHR11993)	mitochondria
CG2129	DSA	0.0999615	3.20399e-08	0.0116696	1		Zinc finger, C2H2-type (IPR787) Zinc finger, C2H2-like (IPR1588)	ZINC FINGER PROTEIN(PTHR11389)	transcription
CG2163	HRP	0.441956	1.59845e-19	4.13126e-05	1	Pabp2	RNA recognition motif, RNP-1 (IPR54) Nucleotide-binding, alpha-beta plait (IPR12677)	POLYADENYLATE-BINDING PROTEIN 2(PTHR1432:SF61)	RNA regulation	**
CG2263	DSA	0.577189	2.45793e-06	0.0017333	1		Phenylalanyl-tRNA synthetase, class IIc (IPR2319) Phenylalanyl-tRNA synthetase, class IIc, alpha subunit (IPR4529) Aminoacyl-tRNA synthetase, class II (IPR6195)	PHENYLALANYL-TRNA SYNTHETASE(PTHR11538:SF15)	translation
CG2286	DSA	0.417044	3.6448e-11	0.000456405	1	NADH:ubiquinone reductase 75kD subunit precursor (ND75)	NADH dehydrogenase 75 kDa subunit, conserved site (IPR283) Ferredoxin (IPR141) Aminotransferase, class-II, pyridoxal-phosphate binding site (IPR1917) 2Fe-2S ferredoxin, iron-sulphur binding site (IPR658) Molybdopterin oxidoreductase (IPR6656) NADH-quinone oxidoreductase, chain G (IPR1228) Beta-grasp fold, ferredoxin-type (IPR12675) NADH-quinone oxidoreductase, chain G, C-terminal (IPR1545)	NADH-UBIQUINONE OXIDOREDUCTASE(PTHR11615:SF1)	mitochondria
CG2448	WGA LCA	1.64 0.64	1.47854E-07 2.60987E-07	0.002033607 0.00699734	1	FucT6	Src homology-3 (IPR1452) Alpha-(1,6)-fucosyltransferase, eukaryotic type (IPR15827) Variant SH3 (IPR11511)	SUBFAMILY NOT NAMED(PTHR13132:SF3)	glycosylenzyme
CG2714	DSA	0.732647	0.00021605	0.0358686	1	cramped (crm)	SANT, DNA-binding (IPR15) Myb, DNA-binding (IPR14778)	CRAMPED PROTEIN(PTHR21677)	transcription
CG3104	DSA WGA	0.72 0.71	0.001008399 0.000607169	0.049048259 0.022530148	1		Ankyrin (IPR211)	ANKYRIN REPEAT DOMAIN 29(PTHR18958:SF184)	cytoskelton
CG31160	DSA	0.591966	0.00212753	0.0223833	1		BTB/POZ fold (IPR011333) BTB/POZ-like (IPR000210) BTB/POZ (IPR013069) Zinc finger, FLYWCH-type (IPR007588)		unknown
CG3248	HRP	0.725309	1.87739e-06	0.000313155	1	Cog3	Sec34-like protein (IPR7265)	CONSERVED OLIGOMERIC GOLGI COMPLEX COMPONENT 3(PTHR1332)	traffic	**
CG3409	DSA	0.686008	0.00124077	0.0236126	1		Major facilitator superfamily MFS-1 (IPR011701) Major facilitator superfamily, general substrate transporter (IPR016196)	MONOCARBOXYLATE TRANSPORTER 1-RELATED(PTHR11360:SF15)	others
CG3845	DSA	0.534193	1.18038e-08	0.00374529	1	NAT1	eIF4-gamma/eIF5/eIF2-epsilon (IPR337) MIF4G-like, type 3 (IPR389) Initiation factor eIF-4 gamma, MA3 (IPR3891) MIF4-like, type 1/2/3 (IPR1621) Armadillo-type fold (IPR1624) )	EUKARYOTIC TRANSLATION INITIATION FACTOR 4 GAMMA 2(PTHR23253:SF5)	translation
CG4184	DSA	0.274005	3.7718e-12	0.00514168	1	Mediator complex subunit 15 (MED15)			transcription
CG4798	DSA	0.485885	7.50357e-10	0.00111493	1	lethal (2) k129	Uridine kinase (IPR764) Phosphoribulokinase/uridine kinase (IPR683)		others
CG4904	LCA HRP	1.48 1.87	3.60208E-15 4.76068E-32	0.024856542 6.07093E-08	1	Pros35	Proteasome alpha-subunit, conserved site (IPR426) 2S proteasome, A and B subunits (IPR1353)		protein degradation
CG5000	HRP DSA	1.33 0.60	0.000108839 2.78611E-06	0.001255586 0.01425987	1	mini spindles (msps)	HEAT (IPR357) Armadillo-like helical (IPR11989) Armadillo-type fold (IPR1624)	MICROTUBULE ASSOCIATED PROTEIN XMAP215(PTHR1269)	cytoskelton
CG5431	HRP DSA	1.45 0.72	2.97671E-16 0.000670991	0.017774608 0.007434269	1		Sulphotransferase (IPR863)	FLAVONOL SULFOTRANSFERASE-LIKE(PTHR11783:SF3)	others
CG5557	ConA DSA	1.46 0.40	2.9713E-05 1.48134E-06	0.00039753 1.13879E-07	1	squeeze (sqz)	Zinc finger, C2H2-type/integrase, DNA-binding (IPR1387) Zinc finger, C2H2-like (IPR1588) Zinc finger, C2H2-type (IPR787)	ZINC FINGER PROTEIN(PTHR11389)	transcription
CG6238	HRP DSA WGA	1.55 0.52 0.44	5.65078E-10 1.02366E-05 0.003120414	7.55738E-07 0.001580368 0.000531685	1	slingshot (ssh)	Protein-tyrosine phosphatase, dual specificity (IPR34) Protein-tyrosine phosphatase (IPR387) DEK C terminal (IPR14876) Protein-tyrosine phosphatase, active site (IPR1613)	SLINGSHOT DUAL SPECIFICITY PHOSPHATASE(PTHR1159:SF31)	cytoskelton
CG6335	DSA	0.64	9.1285e-05	1.92397e-10	1	Histidyl-tRNA synthetase (Aats-his)	WHEP-TRS (IPR738) Aminoacyl-tRNA synthetase, class II (G, H, P and S) (IPR2314) Anticodon-binding (IPR4154) Histidyl-tRNA synthetase, class IIa (IPR4516) Aminoacyl-tRNA synthetase, class II (IPR6195) S15/NS1, RNA-binding (IPR968) Histidyl-tRNA synthetase (IPR1585) Histidyl-tRNA synthetase, class IIa, subgroup (IPR1587)		translation
CG6378	DSA	0.588953	1.35164e-07	0.05003046	1	BM-4-SPARC	Osteonectin-like (IPR1999) Calcium-binding EF-hand (IPR248) EF-Hand type (IPR11992) Follistatin-like, N-terminal (IPR3645) Follistatin-like, N-terminal, subgroup (IPR1524)	SPARC SECRETED PROTEIN(PTHR13866:SF5)	others
CG6586	DSA	0.578199	0.000265128	0.0105609	1	tantalus (tan)			transcription
CG6869	HRP	0.69464	8.15608e-07	*	1	FucTA	Glycosyl transferase, family 10 (IPR001503)	ALPHA(1,3)FUCOSYLTRANSFERASE(PTHR11929:SF8)	glycosylenzyme	**
CG7111	HRP	1.99292	3.23082e-35	0.0384294	1	Receptor of activated protein kinase C 1 (Rack1)	WD4/YVTN repeat-like (IPR15943) WD4 repeat (IPR168) WD4 repeat-like (IPR1146)	RECEPTOR FOR ACTIVATED PROTEIN KINASE C (RACK1)(PTHR19868)	signal transduction	**
CG7129	DSA	0.642488	4.07236e-05	0.0395064	1	lethal (3) 5822	Neutrophil cytosol factor 2 (IPR18) Src homology-3 (IPR1452)	SORBIN(PTHR1661:SF1)	cytoskelton
CG7177	HRP DSA	1.65 0.65	6.81964E-18 0.000682302	0.000967701 0.013027477	1		Protein kinase, core (IPR719) Protein kinase-like (IPR119) Serine/threonine protein kinase-related (IPR17442)	SERINE/THREONINE-PROTEIN KINASE WNK (WITH NO LYSINE)-RELATED	signal transduction
CG7269	HRP	0.571188	2.34603e-08	2.52096e-08	1	Helicase at 25E (Hel25E)	DNA/RNA helicase, C-terminal (IPR165) DNA/RNA helicase, DEAD/DEAH box type, N-terminal (IPR11545) DEAD-like helicase, N-terminal (IPR141) RNA helicase, DEAD-box type, Q motif (IPR1414) Helicase, superfamily 1 and 2, ATP-binding (IPR1421)	DEAD (ASP-GLU-ALA-ASP) BOX POLYPEPTIDE 39 AND P47(PTHR1967:SF5)	RNA regulation	**
CG7611	HRP DSA	1.57 0.68	9.45378E-15 1.13573E-05	8.67756E-13 0.01286389	1		WD4 repeat (IPR168) LisH dimerisation motif (IPR6594) CTLH, C-terminal to LisH motif (IPR6595) WD4 repeat-like (IPR1146)	WD REPEAT PROTEIN 26-RELATED(PTHR22838)	unknown
CG7776	DSA	0.476842	0.000550445	0.0349023	1	Enhancer of Polycomb (E(Pc))			transcription
CG7921	HRP	1.66602	9.41825e-21	2.4102e-12	1	Mgat2	N-acetylglucosaminyltransferase II (IPR7754)	BETA-1,2-N-ACETYLGLUCOSAMINYLTRANSFERASE II(PTHR12871)	glycosylenzyme	**
CG7979	HRP DSA	1.39 0.40	4.70381E-07 5.2798E-10	*	1		NAD-dependent epimerase/dehydratase (IPR159) NAD(P)-binding (IPR164)	DTDP-GLUCOSE 4-6-DEHYDRATASE(PTHR1366:SF35)	glycosylenzyme
CG8542	HRP DSA	2.07 0.48	1.07516E-25 7.96505E-18	0.001536558 8.11813E-09	1	Heat shock protein cognate 5 (Hsc7-5)	Heat shock protein Hsp7 (IPR123) Chaperone DnaK (IPR12725) Heat shock protein 7 (IPR13126)	HEAT SHOCK PROTEIN 7 (HSP7)(PTHR19375:SF1)	others
CG8651	WGA	1.79	8.22858E-07	0.0154874	1	trithorax (trx)	Zinc finger, RING/FYVE/PHD-type (IPR1383) SET (IPR1214) Zinc finger, nuclear hormone receptor-type (IPR1628) Zinc finger, PHD-type (IPR1965) Post-SET zinc-binding region (IPR3616) FY-rich, N-terminal (IPR3888) FY-rich, C-terminal (IPR3889) Zinc finger, RING-type (IPR1841) Zinc finger, FYVE/PHD-type (IPR1111) MLL Transcription Factor (IPR15722) Methyltransferase, trithorax (IPR16569)	MIXED-LINEAGE LEUKEMIA PROTEIN, MLL(PTHR22884:SF1)	transcription
CG9018	DSA	0.791758	5.02554e-09	0.014932	1		Regulation of nuclear pre-mRNA protein (IPR6569) Protein of unknown function DUF618 (IPR693) ENTH/VHS (IPR8942)	CYCLIN-DEPENDENT KINASE INHIBITOR-RELATED PROTEIN (PTHR1246)	RNA regulation
CG9088	DSA	0.611531	0.000301567	0.0109698	1	little imaginal discs (lid)	AT-rich interaction region (IPR166) Zinc finger, PHD-type (IPR1965) Transcription factor jumonji/aspartyl beta-hydroxylase (IPR3347) Transcription factor jumonji, JmjN (IPR3349) Zinc finger, C5HC2-type (IPR4198) Zinc finger, FYVE/PHD-type (IPR1111) Transcription factor jumonji (IPR13129) PLU-1-like (IPR13637) Zinc finger, RING/FYVE/PHD-type (IPR1383)	JUMONJI/ARID DOMAIN-CONTAINING PROTEIN 1(PTHR1694:SF2)	transcription
CG9359	DSA	0.643177	0.000122046	0.00362569	1	β-Tubulin at 85D (βTub85D)	Tubulin (IPR217) Beta tubulin (IPR2453) Tubulin/FtsZ, GTPase (IPR38) Tubulin/FtsZ, C-terminal (IPR828) Beta tubulin, autoregulation binding site (IPR13838)	TUBULIN BETA CHAIN(PTHR11588:SF9)	cytoskelton
CG9412	HRP	1.60136	8.61965e-17	0.0461977	1	rasputin (rin)	Nuclear transport factor 2, Eukaryote (IPR018222) RNA recognition motif, RNP-1 (IPR000504) Nuclear transport factor 2 (IPR002075) Nucleotide-binding, alpha-beta plait (IPR012677)	RNA-BINDING RAS-GAP SH3 BINDING PROTEIN RELATED(PTHR10693)	RNA regulation	**
CG9735	DSA WGA HRP	0.50 0.55 1.96	2.3655E-07 0.000321414 1.00242E-26	0.000107533 7.70601E-07 1.37279E-06	1	Tryptophanyl-tRNA synthetase (Aats-trp)	Aminoacyl-tRNA synthetase, class I, conserved site (IPR1412) Aminoacyl-tRNA synthetase, class Ib (IPR235) Tryptophanyl-tRNA synthetase, class Ib (IPR236) Rossmann-like alpha/beta/alpha sandwich fold (IPR14729)	TRYPTOPHANYL-TRNA SYNTHETASE(PTHR155)	translation
CG10042	HRP	1.46329	4.0795e-07		2	MBD-R2	Methyl-CpG DNA binding (IPR001739) Zinc finger, PHD-type (IPR001965) Zinc finger, C2CH-type (IPR006612) Zinc finger, C2H2-type (IPR007087) Zinc finger, RING/FYVE/PHD-type (IPR013083) Zinc finger, C2H2-like (IPR015880) Zinc finger, FYVE/PHD-type (IPR011011) DNA-binding, integrase-type (IPR016177)	PHD FINGER DOMAIN(PTHR15856:SF5)	transcription	**
CG10067	DSA	0.217928	5.3338e-15		2	Actin 57B	Actin/actin-like conserved site (IPR020902) Actin-like (IPR004000) Actin, conserved site (IPR004001)		cytoskelton
CG10166	WGA	1.84142	5.60404e-16		2		Glycosyl transferase, family 2 (IPR1173)	GLYCOSYLTRANSFERASE RELATED(PTHR1859)	glycosylenzyme
CG10233	DSA	0.381945	1.49759e-10		2	retinophilin	MORN motif (IPR003409)		signal transduction
CG11295	DSA	0.523599	5.70163e-07		2	lethal-(2)-denticleless	WD40/YVTN repeat-like (IPR015943) WD40 repeat, region (IPR017986) WD40 repeat (IPR001680) WD40 repeat-like (IPR011046)	LETHAL(2)DENTICLELESS PROTEIN (RETINOIC ACID-REGULATED NUCLEAR MATRIX-ASSOCIATED PROTEIN)(PTHR22852)	others
CG11576	WGA	0.514053	0.00373703		2		Protein of unknown function DUF1011 (IPR009357)	PERV-A RECEPTOR(PTHR12929)	signal transduction
CG11621	WGA	1.42612	0.00204058		2	Phosphotidylinositol 3 kinase 68D (Pi3K68D)	C2 membrane targeting protein (IPR018029) Phosphatidylinositol 3- and 4-kinase, conserved site (IPR018936) C2 calcium-dependent membrane targeting (IPR000008) Phosphoinositide 3-kinase, ras-binding (IPR000341) Phosphatidylinositol 3- and 4-kinase, catalytic (IPR000403) Phosphoinositide 3-kinase accessory region PIK (IPR001263) Phox-like (IPR001683) Phosphoinositide 3-kinase, C2 (IPR002420) Protei…	PHOPSPHATIDYLINOSITOL 3-KINASE, DROSOPHILA(PTHR10048:SF8)	signal transduction
CG11765	HRP	0.745456	1.91804e-08		2	Peroxiredoxin 2540 (Prx2540-2)	Alkyl hydroperoxide reductase/ Thiol specific antioxidant/ Mal allergen (IPR000866) Thioredoxin fold (IPR012335) Thioredoxin-like fold (IPR012336) Thioredoxin-like (IPR017936)	PEROXIREDOXIN 6 RELATED(PTHR10681:SF17)	others	**
CG11911	HRP	0.63896	1.64558e-08		2		Peptidase S1/S6, chymotrypsin/Hap (IPR001254) Peptidase S1A, chymotrypsin (IPR001314) Serine/cysteine peptidase, trypsin-like (IPR009003) Peptidase S1/S6, chymotrypsin/Hap, active site (IPR018114)	LP10887P (FRAGMENT) (PTHR24272:SF186)	protein degradation	**
CG11981	DSA	0.515176	8.40938e-12		2	Prosβ3	Peptidase T1A, proteasome beta-subunit (IPR243) 2S proteasome, A and B subunits (IPR1353) Proteasome, beta-type subunit, conserved site (IPR165)	PROTEASOME SUBUNIT BETA TYPE 3(PTHR11599:SF7)	protein degradation
CG12000	HRP DSA	1.69 0.50	7.19065E-17 1.61212E-07		2	Prosβ4	2S proteasome, A and B subunits (IPR1353) Peptidase T1A, proteasome beta-subunit (IPR243) Proteasome, beta-type subunit, conserved site (IPR165) Proteasome endopeptidase complex, beta subunit (IPR16295)		protein degradation
CG12932	DSA	0.426958	2.97744e-09		2	bruchpilot (brp)	t-SNARE (IPR010989) Prefoldin (IPR009053) Helix-loop-helix DNA-binding (IPR011598)		others
CG13185	DSA	0.575364	1.53488e-07		2		von Willebrand factor, type A (IPR002035) ATPase, AAA+ type, core (IPR003593) ATPase associated with various cellular activities, AAA-5 (IPR011704) ATPase associated with various cellular activities, AAA-3 (IPR011703)	MIDASIN (MIDAS-CONTAINING PROTEIN(PTHR22908:SF14)	others
CG14359	DSA	0.381853	2.25393e-08		2				unknown
CG14724	DSA	0.42	3.78868e-11		2	Cytochrome c oxidase subunit Va (CoVa)	Cytochrome c oxidase, subunit Va (IPR003204)	CYTOCHROME C OXIDASE POLYPEPTIDE VA(PTHR14200:SF7)	mitochondria
CG15442	DSA	0.615225	0.000180435		2	Ribosomal protein L27A (RpL27A)	Ribosomal protein L15 (IPR001196)	60S RIBOSOMAL PROTEIN L27A(PTHR11721)	translation
CG15881	DSA WGA	1.25 1.59	1.66692E-12 1.94872E-05		2				unknown
CG17556	DSA	0.659577	5.18711e-05		2		Tetratricopeptide TPR-1 (IPR144) Tetratricopeptide-like helical (IPR1199) Tetratricopeptide region (IPR1326)	TETRATRICOPEPTIDE REPEAT PROTEIN(PTHR1276)	unknown
CG17654	HRP DSA	1.42 0.77	1.00972E-10 0.00220924		2	Enolase (Eno)	Enolase (IPR000941)	ENOLASE(PTHR11902)	glycosylenzyme
CG18012	WGA	3.88279	2.96802e-69		2		Glycosyl transferase, group 1 (IPR1296)	BETA1,4 MANNOSYLTRANSFERASE(PTHR1336)	glycosylenzyme
CG18446	WGA	1.52318	2.85991e-06		2		Zinc finger, C2H2-type (IPR007087) Zinc finger, C2H2-like (IPR015880)	ZINC FINGER PROTEIN(PTHR11389)	transcription
CG18627	ConA HRP	1.53 1.36	1.74276E-12 1.80657E-08		2	β subunit of type II geranylgeranyl transferase (βggt-II)	Prenyltransferase/squalene oxidase (IPR001330) Terpenoid cylases/protein prenyltransferase alpha-alpha toroid (IPR008930)	GERANYLGERANYL TRANSFERASE TYPE II BETA SUBUNIT(PTHR11774:SF5)	traffic
CG30488	WGA	0.474574	1.43249e-05		2		Allergen V5/Tpx-1 related (IPR001283) SCP-like extracellular (IPR014044)	PEPTIDASE INHIBITOR 16 (PTHR10334:SF25)	protein degradation
CG3173	WGA HRP	1.62 1.43	1.48911E-07 8.80274E-11		2		Armadillo-type fold (IPR016024)	UNCHARACTERIZED(PTHR21224)	unknown
CG32163	DSA	0.496649	1.69417e-08		2		Acyl-CoA N-acyltransferase (IPR16181)		unknown
CG32445	HRP	1.59923	2.58597e-12		2		Aldose 1-epimerase (IPR008183) Glycoside hydrolase-type carbohydrate-binding (IPR011013) Glycoside hydrolase-type carbohydrate-binding, subgroup (IPR014718) Aldose 1-epimerase, subgroup (IPR015443)	ALDOSE 1-EPIMERASE (PTHR10091:SF0)	others	**
CG3329	DSA	0.611625	1.83506e-14		2	Prosβ2	Peptidase T1A, proteasome beta-subunit (IPR243) 2S proteasome, A and B subunits (IPR1353) Proteasome, beta-type subunit, conserved site (IPR165)	PROTEASOME SUBUNIT BETA TYPE 7,1(PTHR11599:SF1)	protein degradation
CG3544	DSA	0.672711	2.22781e-05		2		Carbohydrate kinase, FGGY (IPR000577) Carbohydrate kinase, FGGY, N-terminal (IPR018484)	XYLULOSE KINASE(PTHR10196:SF5)	others
CG3649	DSA	0.661225	2.19436e-06		2		Major facilitator superfamily MFS-1 (IPR011701) Major facilitator superfamily, general substrate transporter (IPR016196)	SODIUM-DEPENDENT PHOSPHATE TRANSPORTER-RELATED(PTHR11662:SF27)	others
CG3683	HRP DSA	1.68 0.55	5.63961E-25 2.69923E-08		2		CHCH (IPR1625) NADH dehydrogenase [ubiquinone] (complex I), alpha subcomplex, subunit 8 (IPR1668)	NADH-UBIQUINONE OXIDOREDUCTASE(PTHR13344)	mitochondria
CG3700	WGA	1.51105	0.000276053		2		Peptidase S1 and S6, chymotrypsin/Hap (IPR001254) Peptidase S1A, chymotrypsin (IPR001314) Peptidase, trypsin-like serine and cysteine (IPR009003) Peptidase S1/S6, chymotrypsin/Hap, active site (IPR018114)	SERINE PROTEASE-RELATED, INSECT(PTHR19355:SF174)	protein degradation
CG3749	WGA	1.436	0.00128595		2	Activating transcription factor-2 (Atf-2)	Basic-leucine zipper (bZIP) transcription factor (IPR004827) Neural proliferation differentiation control-1 (IPR009635) Basic leucine zipper (IPR011700)	NEURAL PROLIFERATION DIFFERENTIATION AND CONTROL PROTEIN-1 (NPDC-1 PROTEIN)(PTHR23352)	transcription
CG3944	DSA	0.202612	8.75524e-16		2	NADH:ubiquinone reductase 23kD subunit precursor (ND23)	4Fe-4S ferredoxin, iron-sulphur binding, subgroup (IPR001450) Alpha-helical ferredoxin (IPR009051) NADH-quinone oxidoreductase, chain I (IPR010226) 4Fe-4S ferredoxin, iron-sulpur binding domain (IPR017896) 4Fe-4S ferredoxin, iron-sulphur binding, conserved site (IPR017900)	NADH-UBIQUINONE OXIDOREDUCTASE 1, CHAIN 1(PTHR10849)	mitochondria
CG4071	HRP DSA	1.66 0.69	1.94017E-21 0.00098809		2	Vps2	Snf7 (IPR524)	SNF7 - RELATED(PTHR22761)	traffic
CG4606	HRP	1.55974	5.87515e-12		2	α-Man-IIb	Glycoside hydrolase, family 38, core (IPR62) Type II secretion system (IPR1992) Glycoside hydrolase-type carbohydrate-binding (IPR1113) Glycosyl hydrolases 38, C-terminal (IPR11682) Glycoside hydrolase/deacetylase, beta/alpha-barrel (IPR1133) Glycoside hydrolase, family 38, central region (IPR15341)	MANNOSIDASE ALPHA CLASS 2A(PTHR1167:SF4)	glycosylenzyme	**
CG5119	DSA	0.630539	3.63518e-05		2	polyA-binding protein (pAbp)	RNA recognition motif, RNP-1 (IPR54) Polyadenylate-binding protein/Hyperplastic disc protein (IPR24) Polyadenylate binding protein, human types 1, 2, 3, 4 (IPR6515) Nucleotide-binding, alpha-beta plait (IPR12677)	POLYADENYLATE-BINDING PROTEIN(PTHR1432:SF69)	RNA regulation
CG5215	DSA WGA	0.58 -0.07	8.74515E-06 2.50079E-15		2	Zn72D	Zinc finger, C2H2-like (IPR1588) Zinc finger, U1-type (IPR364) DZF (IPR6561) Zinc finger, C2H2-type (IPR787)	DOUBLE-STRANDED RNA-BINDING PROTEIN ZN72D(PTHR191:SF23)	RNA regulation
CG5266	DSA	0.17	1.1467e-09		2	Proteasome 25kD subunit (Pros25)	2S proteasome, A and B subunits (IPR1353) Proteasome alpha-subunit, conserved site (IPR426)		protein degradation
CG5412	DSA	0.555102	2.19963e-06		2				unknown
CG5731	HRP DSA	2.09 0.57	6.31343E-32 6.49219E-06		2		Glycoside hydrolase, clan GH-D (IPR000111) Glycoside hydrolase, family 27 (IPR002241) Glycosyl hydrolase, family 13, all-beta (IPR013780) Aldolase-type TIM barrel (IPR013785) Glycoside hydrolase, catalytic core (IPR017853)	ALPHA-GALACTOSIDASE/ALPHA-N-ACETYLGALACTOSAMINIDASE(PTHR11452)	glycosylenzyme
CG6253	DSA	0.453582	2.54629e-07		2	Ribosomal protein L14 (RpL14)	Ribosomal protein L14 (IPR2784)	6S RIBOSOMAL PROTEIN L14(PTHR11127)	translation
CG6329	DSA	0.517197	8.33958e-06		2				unknown
CG7187	WGA	0.436127	6.23069e-06		2	Sequence-specific single-stranded DNA-binding protein (Ssdp)	LisH dimerisation motif (IPR006594) Sequence-specific single-strand DNA-binding protein (IPR008116)		transcription
CG7429	HRP	1.39534	5.53527e-12		2			PROTEIN AD-16-RELATED (PTHR1315)	unknown	**
CG7531	DSA WGA HRP	0.60 0.32 0.63	0.002260746 1.72899E-12 0.000492811		2	RhoGAP18B			signal transduction
CG7610	WGA HRP DSA	1.69 1.80 -0.13	2.00649E-16 1.35465E-13 1.30377E-21		2	ATP synthase-γ chain (ATPsyn-γ)	ATPase, F1 complex, gamma subunit (IPR131)	ATP SYNTHASE GAMMA SUBUNIT 1(PTHR11693:SF5)	mitochondria
CG8184	HRP	1.39655	1.14632e-09		2		Ubiquitin-associated/translation elongation factor EF1B, N-terminal (IPR449) HECT (IPR569) WWE (IPR417) E3 ubiquitin ligase, region of unknown function DUF98 (IPR139) E3 ubiquitin ligase, region of unknown function DUF913 (IPR1314) Ubiquitin-associated/translation elongation factor EF1B, N-terminal, eukaryote (IPR1594) Armadillo-type fold (IPR1624)	E3 UBIQUITIN PROTEIN LIGASE URE-B1(PTHR11254:SF67)	protein degradation	**
CG8890	DSA WGA LCA HRP	2.46 2.58 0.64 0.10	6.55849E-28 3.06547E-16 8.9501E-06 2.83975E-28		2	GDP-mannose 4,6-dehydratase (Gmd)	NAD-dependent epimerase/dehydratase (IPR159) Short-chain dehydrogenase/reductase SDR (IPR2198) GDP-mannose 4,6-dehydratase (IPR6368) NAD(P)-binding (IPR164)	GDP MANNOSE-4,6-DEHYDRATASE(PTHR1366:SF32)	glycosylenzyme
CG9746	HRP	1.32	6.03515e-09		2	immune response deficient 1 (ird1)	Protein kinase, catalytic domain (IPR000719) WD40 repeat (IPR001680) Serine/threonine-protein kinase, active site (IPR008271) Protein kinase-like domain (IPR011009) WD40 repeat-like-containing domain (IPR011046) WD40-repeat-containing domain (IPR017986) WD40/YVTN repeat-like-containing domain (IPR015943) Armadillo-type fold (IPR016024) Serine/threonine-protein kinase-like domain (IPR017442) WD40 …		signal transduction	**
CG9783	WGA	0.0420884	4.58689e-13		2		Protein kinase-like (IPR119) Tyrosine protein kinase (IPR1245) Adenylyl cyclase class-3/4/guanylyl cyclase (IPR154) Protein kinase, core (IPR719)		signal transduction
Note: *: n = 1 but very strong phenotype.
**:α1,3-fucosylation-specific effect.
