# Supplementary material for: Identification of Genes Required for Neural-Specific Glycosylation Using Functional Genomics
Source: PLoS Genet. 2010 Dec 23;6(12):e1001254. doi: 10.1371/journal.pgen.1001254 (PMC3009669; doi:10.1371/journal.pgen.1001254)
Supplement: Table S5 — Manmalian homolog. (0.03 MB XLS) [file pgen.1001254.s010.xls]

## Sheet: Table S3
Table S5. Manmalian homolog
CG No.	Drosophila Gene name	Manmalian Gene name	Transcript ID
CG10042	MBD-R2	PHF20	ENSG00000025293
CG10067	Actin 57B
CG10084	second mitotic wave missing (swm)	RBM26	ENSG00000139746
CG10166		DPM1	ENSG00000000419
CG10233	retinophilin	MORN4	ENSG00000171160
CG10279	Rm62
CG1129		GMPPB	ENSG00000173540
CG11295	lethal-(2)-denticleless	WDR17	ENSG00000150627
CG11576		C20orf54	ENSG00000101276
CG11621	Phosphotidylinositol 3 kinase 68D (Pi3K68D)	PIK3C2A PIK3C2B	ENSG00000011405 ENSG00000133056
CG11661	Neural conserved at 73EF (Nc73EF)	OGDH	ENSG00000105953
CG11765	Peroxiredoxin 2540 (Prx2540-2)
CG11856	Nup358	RANBP2	ENSG00000153201
CG11892
CG11911
CG11981	Prosβ3	PSMB3	ENSG00000108294
CG12000	Prosβ4	PSMB4	ENSG00000159377
CG1291		ALG2	ENSG00000119523
CG12932	bruchpilot (brp)
CG13144
CG1318	Hexosaminidase 1 (Hexo1)	HEXB HEXA	ENSG00000049860 ENSG00000213614
CG13185		MDN1	ENSG00000112159
CG13431	UDP-GlcNAc:a-3-D-mannoside-β-1,2-N-acetylglucosaminyltransferase I (Mgat1)	MGAT1	ENSG00000131446
CG13961	sickie (sick)
CG14359
CG14472	purity of essence (poe)	UBR4	ENSG00000127481
CG14542	Vps20	CHMP2A	ENSG00000130724
CG14724	Cytochrome c oxidase subunit Va (CoVa)	COX5A	ENSG00000178741
CG1521		SLC41A2	ENSG00000136052
CG15442	Ribosomal protein L27A (RpL27A)
CG15506
CG15589
CG15881		CCDC58	ENSG00000160124
CG17246	Succinyl coenzyme A synthetase flavoprotein subunit (Scs-fp)	SDHA	ENSG00000073578
CG17489	RpL5	RPL5	ENSG00000122406
CG17556		TTC35	ENSG00000104412
CG17562
CG17654	Enolase (Eno)	ENO1	ENSG00000074800
CG18004		INO80E	ENSG00000169592
CG18005		AC116353.22	ENSG00000113141
CG18012		ALG1	ENSG00000033011
CG18446		Gtf3a	ENSMUSG00000016503
CG18627	β subunit of type II geranylgeranyl transferase (βggt-II)	RABGGTB	ENSG00000137955
CG1970		NDUFS2	ENSG00000158864
CG2129
CG2163	Pabp2	PABPN1	ENSG00000100836
CG2263		FARSA	ENSG00000179115
CG2286	NADH:ubiquinone reductase 75kD subunit precursor (ND75)	NDUFS1	ENSG00000023228
CG2448	FucT6	FUT8	ENSG00000033170
CG2714	cramped (crm)	CRAMP1L	ENSG00000007545
CG30488
CG3104		ANKRD29	ENSG00000154065
CG31160
CG3173		INTS1	ENSG00000164880
CG32163
CG32445
CG3248	Cog3	COG3	ENSG00000136152
CG3329	Prosβ2	PSMB7	ENSG00000136930
CG3409		Slc16a12	ENSMUSG00000009378
CG3544		XYLB	ENSG00000093217
CG3649
CG3683		NDUFA8	ENSG00000119421
CG3700
CG3749	Activating transcription factor-2 (Atf-2)	CREB5	ENSG00000146592
CG3845	NAT1	EIF4G2	ENSG00000110321
CG3944	NADH:ubiquinone reductase 23kD subunit precursor (ND23)	NDUFS8	ENSG00000110717
CG4071	Vps2	CHMP6	ENSG00000176108
CG4184	Mediator complex subunit 15 (MED15)	MED15	ENSG00000099917
CG4606	α-Man-IIb
CG4798	lethal (2) k129	UCKL1	ENSG00000198276
CG4904	Pros35	PSMA1	ENSG00000129084
CG5000	mini spindles (msps)	CKAP5	ENSG00000175216
CG5119	polyA-binding protein (pAbp)	PABPC1	ENSG00000070756
CG5215	Zn72D	ZFR2	ENSG00000105278
CG5266	Proteasome 25kD subunit (Pros25)	PSMA2	ENSG00000106588
CG5412		OVCA2201	ENSG00000214014
CG5431		SULT1E1 SULT1B1	ENSG00000109193 ENSG00000173597
CG5557	squeeze (sqz)
CG5731		NAGA	ENSG00000198951
CG6238	slingshot (ssh)	SSH3	ENSG00000172830
CG6253	Ribosomal protein L14 (RpL14)	RPL14	ENSG00000188846
CG6329
CG6335	Histidyl-tRNA synthetase (Aats-his)	HARS	ENSG00000170445
CG6378	BM-4-SPARC	SPARC SPARCL1	ENSG00000113140 ENSG00000152583
CG6586	tantalus (tan)
CG6869	FucTA
CG7111	Receptor of activated protein kinase C 1 (Rack1)	GNB2L1	ENSG00000204628
CG7129	lethal (3) 5822
CG7177		WNK1	ENSG00000060237
CG7187	Sequence-specific single-stranded DNA-binding protein (Ssdp)	SSBP3	ENSG00000157216
CG7269	Helicase at 25E (Hel25E)	BAT1	ENSG00000198563 ENSG00000215412 ENSG00000215425
CG7429		CCDC53	ENSG00000120860
CG7531	RhoGAP18B
CG7610	ATP synthase-γ chain (ATPsyn-γ)	ATP5C1	ENSG00000165629
CG7611		WDR26	ENSG00000162923
CG7776	Enhancer of Polycomb (E(Pc))	EPC1	ENSG00000120616
CG7921	Mgat2	MGAT2	ENSG00000168282
CG7979		UXS1	ENSG00000115652
CG8184		HUWE1	ENSG00000086758
CG8542	Heat shock protein cognate 5 (Hsc7-5)	HSPA9B	ENSG00000113013
CG8651	trithorax (trx)	MLL	ENSG00000118058
CG8890	GDP-mannose 4,6-dehydratase (Gmd)	GMDS	ENSG00000112699
CG9018		RPRD1B	ENSG00000101413
CG9088	little imaginal discs (lid)	JARID1A	ENSG00000073614
CG9359	β-Tubulin at 85D (βTub85D)	TUBB2C	ENSG00000188229
CG9412	rasputin (rin)	G3BP1	ENSG00000145907
CG9735	Tryptophanyl-tRNA synthetase (Aats-trp)	WARS	ENSG00000140105
CG9746	immune response deficient 1 (ird1)	PI3KR4	ENSG00000196455
CG9783		Gucy2e	ENSRNOG00000007931
